# Supplementary material for: Correlation network analysis for data integration and biomarker selection
Source: Royal Society of Chemistry journal article supplement (doi:10.1039/b708489g), 2008-01-16
Supplement: b708489g.pdf [file b708489g.pdf]

**Table S1.** All Measured Plasma Triglyceride (TG) Analytes.

| Plasma Triglyceride | Seven-day 200 mg/kg/day treatment group change relative to vehicle group ( $\pm$ standard error of mean) | Significance of change ('+' indicates $p_{\text{FDR}} < 0.05$ ) | Also measured in liver tissue? ('+' indicates yes) | Median integrated peak area in vehicle group <sup>†</sup> (arb. units) |
|---------------------|----------------------------------------------------------------------------------------------------------|-----------------------------------------------------------------|----------------------------------------------------|------------------------------------------------------------------------|
| 46:0 TG             | -49% $\pm$ 13%                                                                                           | +                                                               |                                                    | 2329                                                                   |
| 46:1 TG             | -73% $\pm$ 7%                                                                                            | +                                                               |                                                    | 4498                                                                   |
| 47:0 TG             | -18% $\pm$ 12%                                                                                           | +                                                               |                                                    | 1481                                                                   |
| 47:1 TG             | -46% $\pm$ 7%                                                                                            | +                                                               |                                                    | 16025                                                                  |
| 48:0 TG             | -54% $\pm$ 11%                                                                                           | +                                                               |                                                    | 13790                                                                  |
| 48:1 TG             | -81% $\pm$ 6%                                                                                            | +                                                               |                                                    | 21937                                                                  |
| 48:2 TG             | -82% $\pm$ 5%                                                                                            | +                                                               |                                                    | 25652                                                                  |
| 48:3 TG             | -74% $\pm$ 8%                                                                                            | +                                                               |                                                    | 6295                                                                   |
| 49:2 TG             | -60% $\pm$ 8%                                                                                            | +                                                               |                                                    | 8462                                                                   |
| 49:3 TG             | -60% $\pm$ 9%                                                                                            | +                                                               |                                                    | 3132                                                                   |
| 50:1 TG             | -74% $\pm$ 9%                                                                                            | +                                                               | +                                                  | 87408                                                                  |
| 50:2 TG             | -71% $\pm$ 9%                                                                                            | +                                                               | +                                                  | 167384                                                                 |
| 50:3 TG             | -73% $\pm$ 9%                                                                                            | +                                                               | +                                                  | 75210                                                                  |
| 50:4 TG             | -72% $\pm$ 11%                                                                                           | +                                                               | +                                                  | 14941                                                                  |
| 51:2 TG             | -65% $\pm$ 5%                                                                                            | +                                                               |                                                    | 10987                                                                  |
| 51:3 TG             | -69% $\pm$ 5%                                                                                            | +                                                               |                                                    | 6093                                                                   |
| 51:4 TG             | -63% $\pm$ 12%                                                                                           | +                                                               | +                                                  | 5318                                                                   |
| 52:1 TG             | -64% $\pm$ 11%                                                                                           | +                                                               |                                                    | 41075                                                                  |
| 52:2 TG             | -70% $\pm$ 9%                                                                                            | +                                                               | +                                                  | 307162                                                                 |
| 52:3 TG             | -49% $\pm$ 13%                                                                                           | +                                                               |                                                    | 274998                                                                 |
| 52:4 TG             | -40% $\pm$ 17%                                                                                           | +                                                               | +                                                  | 201736                                                                 |
| 52:5 TG             | -56% $\pm$ 17%                                                                                           | +                                                               | +                                                  | 51209                                                                  |
| 53:4 TG             | -49% $\pm$ 11%                                                                                           | +                                                               |                                                    | 4665                                                                   |
| 54:2 TG             | -61% $\pm$ 12%                                                                                           | +                                                               | +                                                  | 27044                                                                  |
| 54:3 TG             | -50% $\pm$ 13%                                                                                           | +                                                               |                                                    | 65329                                                                  |
| 54:4 TG             | -41% $\pm$ 19%                                                                                           | +                                                               | +                                                  | 40095                                                                  |
| 54:5 TG             | -55% $\pm$ 11%                                                                                           | +                                                               | +                                                  | 57278                                                                  |
| 54:6 TG             | -52% $\pm$ 15%                                                                                           | +                                                               | +                                                  | 128350                                                                 |
| 54:7 TG             | -66% $\pm$ 14%                                                                                           | +                                                               |                                                    | 37189                                                                  |
| 56:6 TG             | -14% $\pm$ 20%                                                                                           |                                                                 | +                                                  | 21018                                                                  |
| 56:7 TG             | -24% $\pm$ 24%                                                                                           |                                                                 | +                                                  | 32430                                                                  |
| 56:8 TG             | -20% $\pm$ 29%                                                                                           |                                                                 | +                                                  | 11090                                                                  |
| 58:8 TG             | +24% $\pm$ 15%                                                                                           |                                                                 | +                                                  | 5143                                                                   |
| 58:9 TG             | +17% $\pm$ 21%                                                                                           |                                                                 | +                                                  | 3569                                                                   |

<sup>†</sup> Provided as an assessment of relative abundances of plasma triglyceride species in vehicle group. Scale is not identical to that of reported peak areas in other Tables elsewhere.

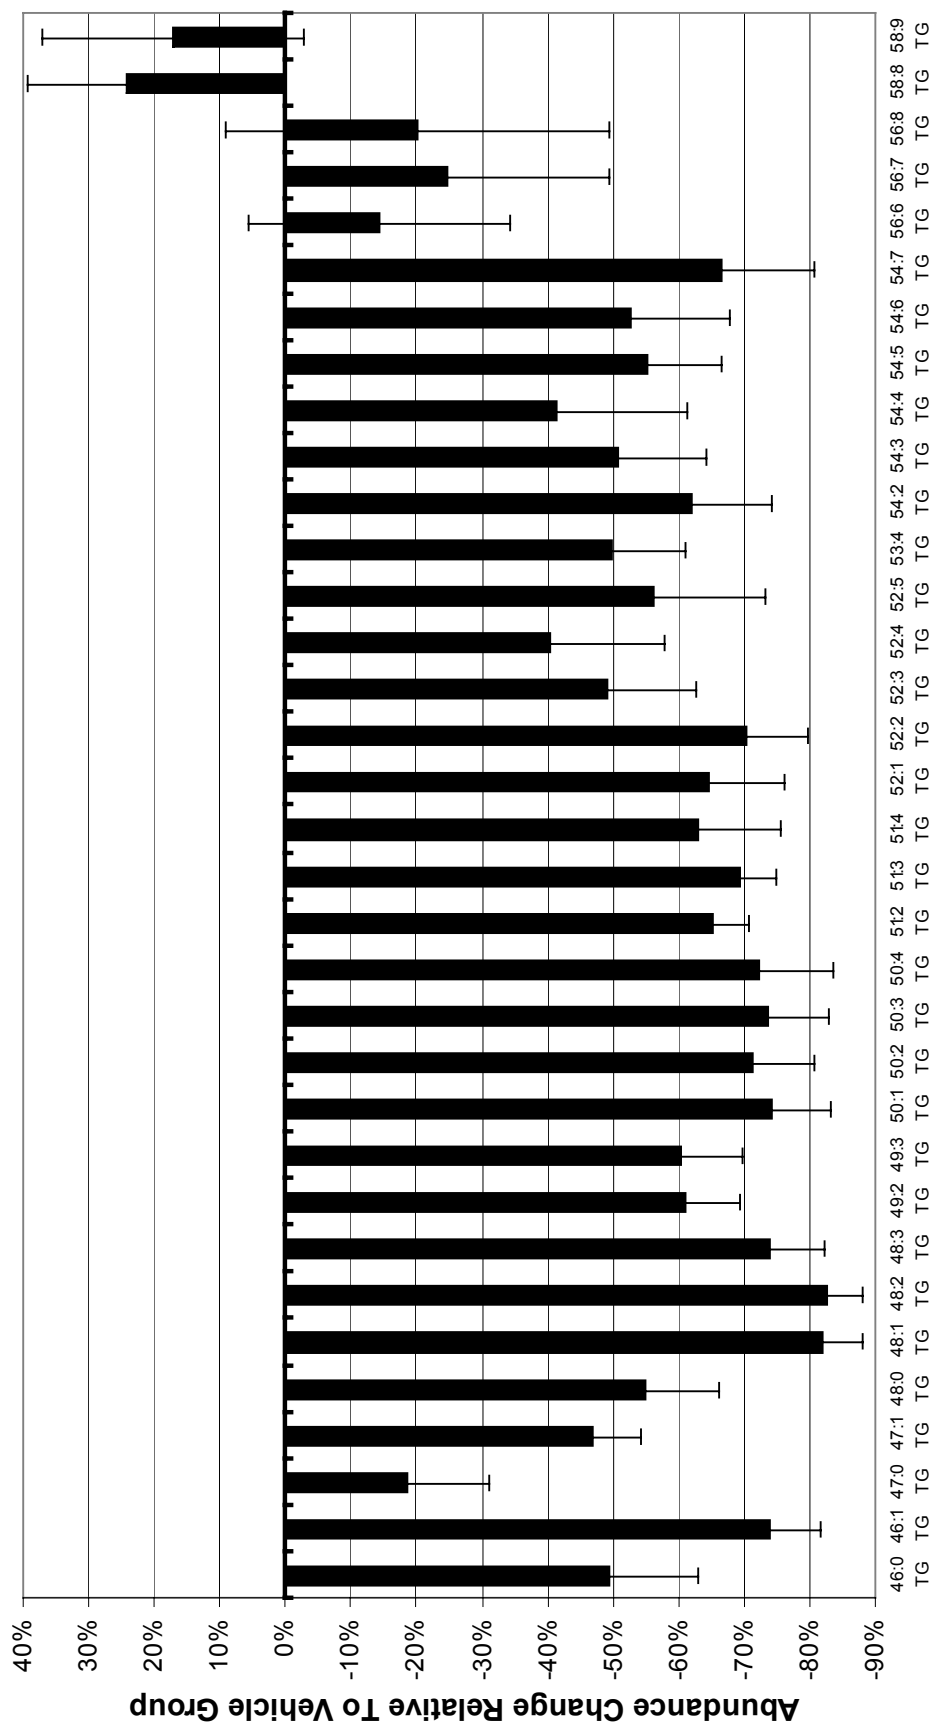

**Figure S1.** (above) Change in plasma abundances of all observed triglyceride species (also listed in Table S1) in the 7-day 200 mg/kg/day treatment group relative to the vehicle-administered group. Error bars represent standard error of the mean.

**Table S2.** All Measured Liver Tissue Triglyceride (TG) Analytes.

| Liver Triglyceride | Seven-day 200 mg/kg/day treatment group change relative to vehicle group ( $\pm$ standard error of mean) | Significance of change ('+' indicates $p_{\text{FDR}} < 0.05$ ) | Also measured in plasma? ('+' indicates yes) | Median integrated peak area in vehicle group <sup>†</sup> (arb. units) |
|--------------------|----------------------------------------------------------------------------------------------------------|-----------------------------------------------------------------|----------------------------------------------|------------------------------------------------------------------------|
| 50:1 TG            | -57% $\pm$ 9%                                                                                            | +                                                               | +                                            | 113269                                                                 |
| 50:2 TG            | -71% $\pm$ 6%                                                                                            | +                                                               | +                                            | 39022                                                                  |
| 50:3 TG            | -69% $\pm$ 6%                                                                                            | +                                                               | +                                            | 17328                                                                  |
| 50:4 TG            | +57% $\pm$ 45%                                                                                           | +                                                               | +                                            | 61447                                                                  |
| 51:4 TG            | +159% $\pm$ 71%                                                                                          | +                                                               | +                                            | 11045                                                                  |
| 52:2 TG            | -21% $\pm$ 21%                                                                                           |                                                                 | +                                            | 1767110                                                                |
| 52:4 TG            | +205% $\pm$ 73%                                                                                          | +                                                               | +                                            | 547222                                                                 |
| 52:5 TG            | +158% $\pm$ 83%                                                                                          | +                                                               | +                                            | 126711                                                                 |
| 54:2 TG            | +138% $\pm$ 77%                                                                                          | +                                                               | +                                            | 45358                                                                  |
| 54:4 TG            | +260% $\pm$ 103%                                                                                         | +                                                               | +                                            | 153539                                                                 |
| 54:5 TG            | +198% $\pm$ 63%                                                                                          | +                                                               | +                                            | 207081                                                                 |
| 54:6 TG            | +227% $\pm$ 90%                                                                                          | +                                                               | +                                            | 121766                                                                 |
| 56:6 TG            | +210% $\pm$ 96%                                                                                          | +                                                               | +                                            | 66782                                                                  |
| 56:7 TG            | +272% $\pm$ 118%                                                                                         | +                                                               | +                                            | 106647                                                                 |
| 56:8 TG            | +497% $\pm$ 184%                                                                                         | +                                                               | +                                            | 66880                                                                  |
| 58:7 TG            | +355% $\pm$ 156%                                                                                         | +                                                               |                                              | 12801                                                                  |
| 58:8 TG            | +492% $\pm$ 161%                                                                                         | +                                                               | +                                            | 30404                                                                  |
| 58:9 TG            | +831% $\pm$ 255%                                                                                         | +                                                               | +                                            | 15137                                                                  |
| 58:10 TG           | +983% $\pm$ 310%                                                                                         | +                                                               |                                              | 7139                                                                   |

<sup>†</sup> Provided as an assessment of relative abundances of triglyceride species in vehicle group. Scale is not identical to that of reported peak areas in other Tables elsewhere.

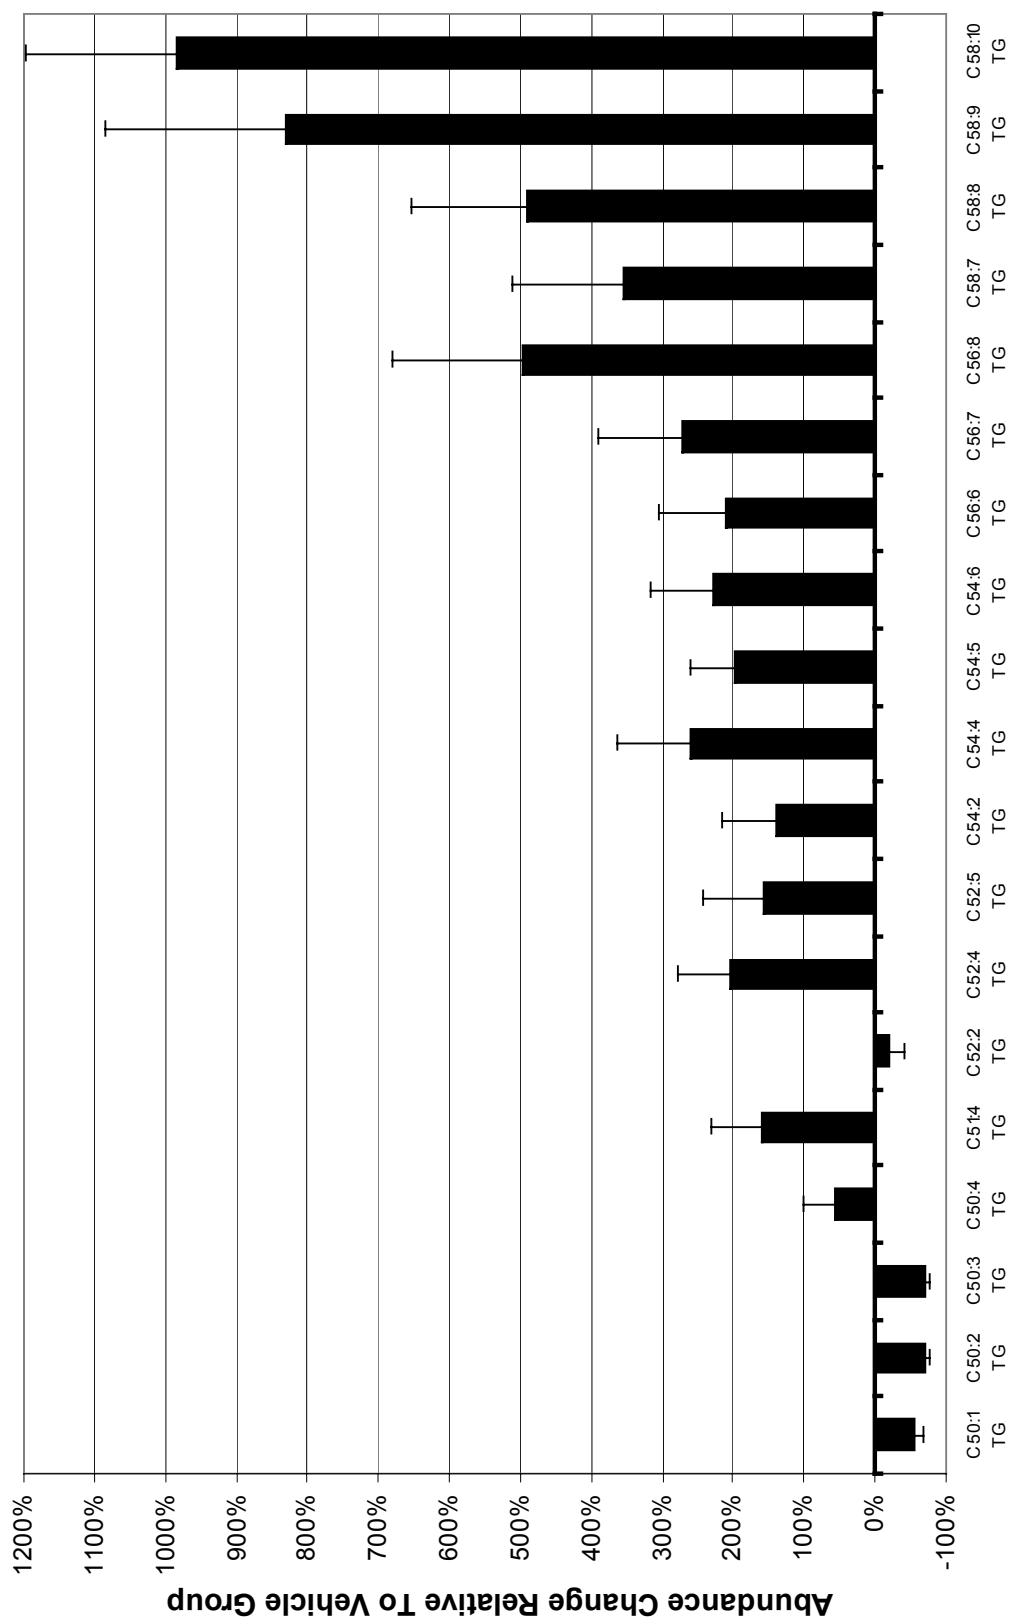

**Figure S2.** (above) Change in abundances in liver tissue of all observed triglyceride species (also listed in Table S1) in the 7-day 200 mg/kg/day treatment group relative to the vehicle-administered group. Error bars represent standard error of the mean.

**Table S3.** All Measured Liver Tissue Phosphatidylcholine (PC) and Lyso-Phosphatidylcholine (LPC) Analytes.

| Liver PC or LPC | Seven-day 200 mg/kg/day treatment group change relative to vehicle group ( $\pm$ standard error of mean) | Significance of change ('+' indicates $p_{\text{FDR}} < 0.05$ ) | Median integrated peak area in vehicle group <sup>†</sup> (arb. units) |
|-----------------|----------------------------------------------------------------------------------------------------------|-----------------------------------------------------------------|------------------------------------------------------------------------|
| 18:1 LPC        | -78% $\pm$ 5%                                                                                            | +                                                               | 43017                                                                  |
| 32:1 PC         | -78% $\pm$ 4%                                                                                            | +                                                               | 862687                                                                 |
| 33:1 PC         | -53% $\pm$ 6%                                                                                            | +                                                               | 48026                                                                  |
| 34:1 PC         | -42% $\pm$ 5%                                                                                            | +                                                               | 2389300                                                                |
| 34:3 PC         | -38% $\pm$ 9%                                                                                            | +                                                               | 357149                                                                 |
| 35:1 PC         | -47% $\pm$ 6%                                                                                            | +                                                               | 24536                                                                  |
| 36:2 PC         | -36% $\pm$ 5%                                                                                            | +                                                               | 139182                                                                 |
| 37:4 PC         | +117% $\pm$ 40%                                                                                          | +                                                               | 74156                                                                  |
| 38:4 PC         | +55% $\pm$ 10%                                                                                           | +                                                               | 3157790                                                                |

<sup>†</sup>Provided as an assessment of relative abundances of triglyceride species in vehicle group. Scale is not identical to that of reported peak areas in other Tables elsewhere.

**Table S4.** Correlation among the three liver peptide measurements that map to the Ugt1a1 protein in liver. There three possible pairwise correlations.

| Peptide Pair                       | correlation value ( $r_{\text{partial}}$ ) <sup>†</sup> | $p_{\text{FDR}}$ of correlation |
|------------------------------------|---------------------------------------------------------|---------------------------------|
| AMEIAEALGR and GHEVVVIAPEASIIHK    | +0.72                                                   | 0.007                           |
| AMEIAEALGR and SLGSMVSEIPEKK       | +0.96                                                   | 0.001                           |
| SLGSMVSEIPEKK and GHEVVVIAPEASIIHK | +0.71                                                   | 0.008                           |

<sup>†</sup>Partial correlations controlling for group mean values are appropriate for calculations in order to avoid trivial correlations driven by group mean differences; see text for details.

**Table S5.** Correlation among measured the four plasma ornithine ions. There are six possible pairwise correlations.

| Ornithine Ion Pair             | correlation value ( $r_{\text{partial}}$ ) <sup>†</sup> | $p_{\text{FDR}}$ of correlation |
|--------------------------------|---------------------------------------------------------|---------------------------------|
| ornithine (M+) and ornithine_1 | +0.98                                                   | <0.001                          |
| ornithine (M+) and ornithine_2 | +0.99                                                   | <0.001                          |
| ornithine (M+) and ornithine_3 | +0.99                                                   | <0.001                          |
| ornithine_1 and ornithine_2    | +0.99                                                   | <0.001                          |
| ornithine_1 and ornithine_3    | +0.98                                                   | <0.001                          |
| ornithine_2 and ornithine_3    | +0.99                                                   | <0.001                          |

<sup>†</sup>Of the four GC/MS peaks identified as ornithine, ‘Ornithine (M<sup>+</sup>)’ is the identified molecular ion; ‘ornithine\_1’ is a fragment ion; ‘ornithine\_2’ is a second fragment ion; ‘ornithine\_3’ is a third fragment ion. As expected, there is a high degree of correlation among these ions.
